# Supplementary material for: Relationship between the Dynamics of Gross Composition, Free Fatty Acids and Biogenic Amines, and Microbial Shifts during the Ripening of Raw Ewe Milk-Derived Idiazabal Cheese
Source: MDPI journal article supplement (doi:10.3390/ani12223224), 2022-11-21
Supplement: s1 [file s1]

**CCorA biplot**  
First data table (Y)

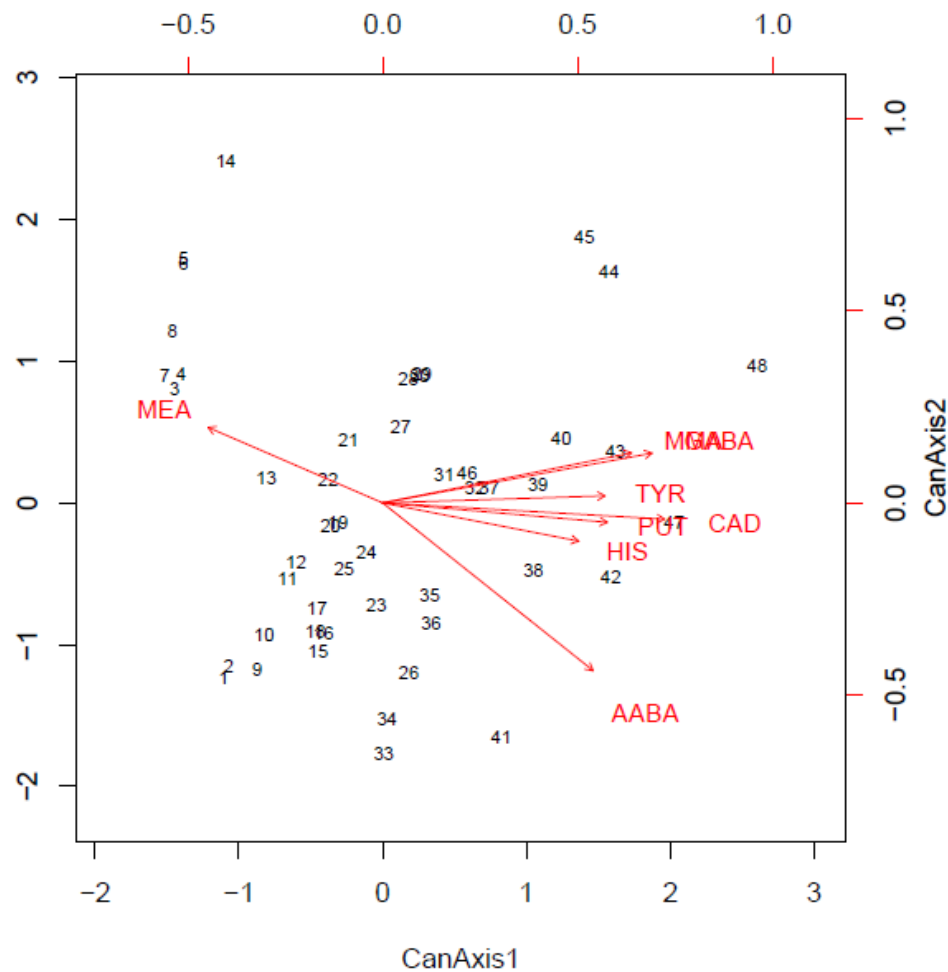

**CCorA biplot**  
Second data table (X)

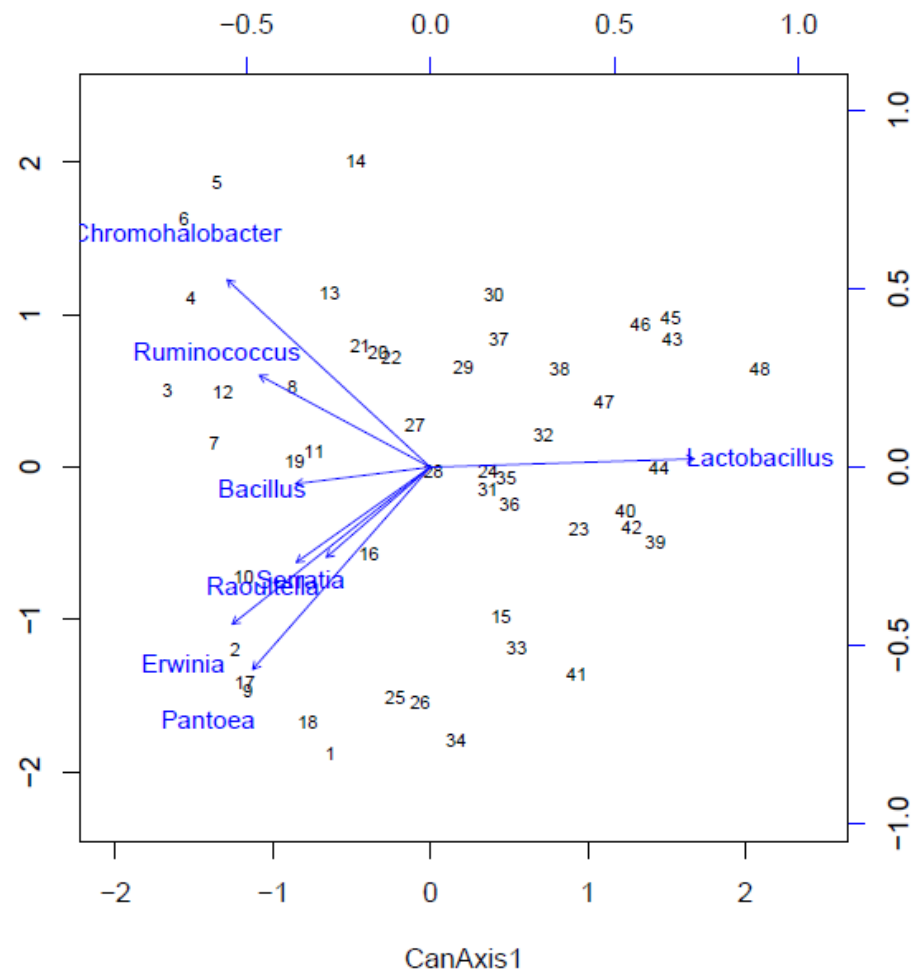

**Figure S4.** CCorA analysis between key bacterial genera and BAs.
