# Supplementary material for: Relationship between the Dynamics of Gross Composition, Free Fatty Acids and Biogenic Amines, and Microbial Shifts during the Ripening of Raw Ewe Milk-Derived Idiazabal Cheese
Source: MDPI journal article supplement (doi:10.3390/ani12223224), 2022-11-21
Supplement: s1 [file s1]

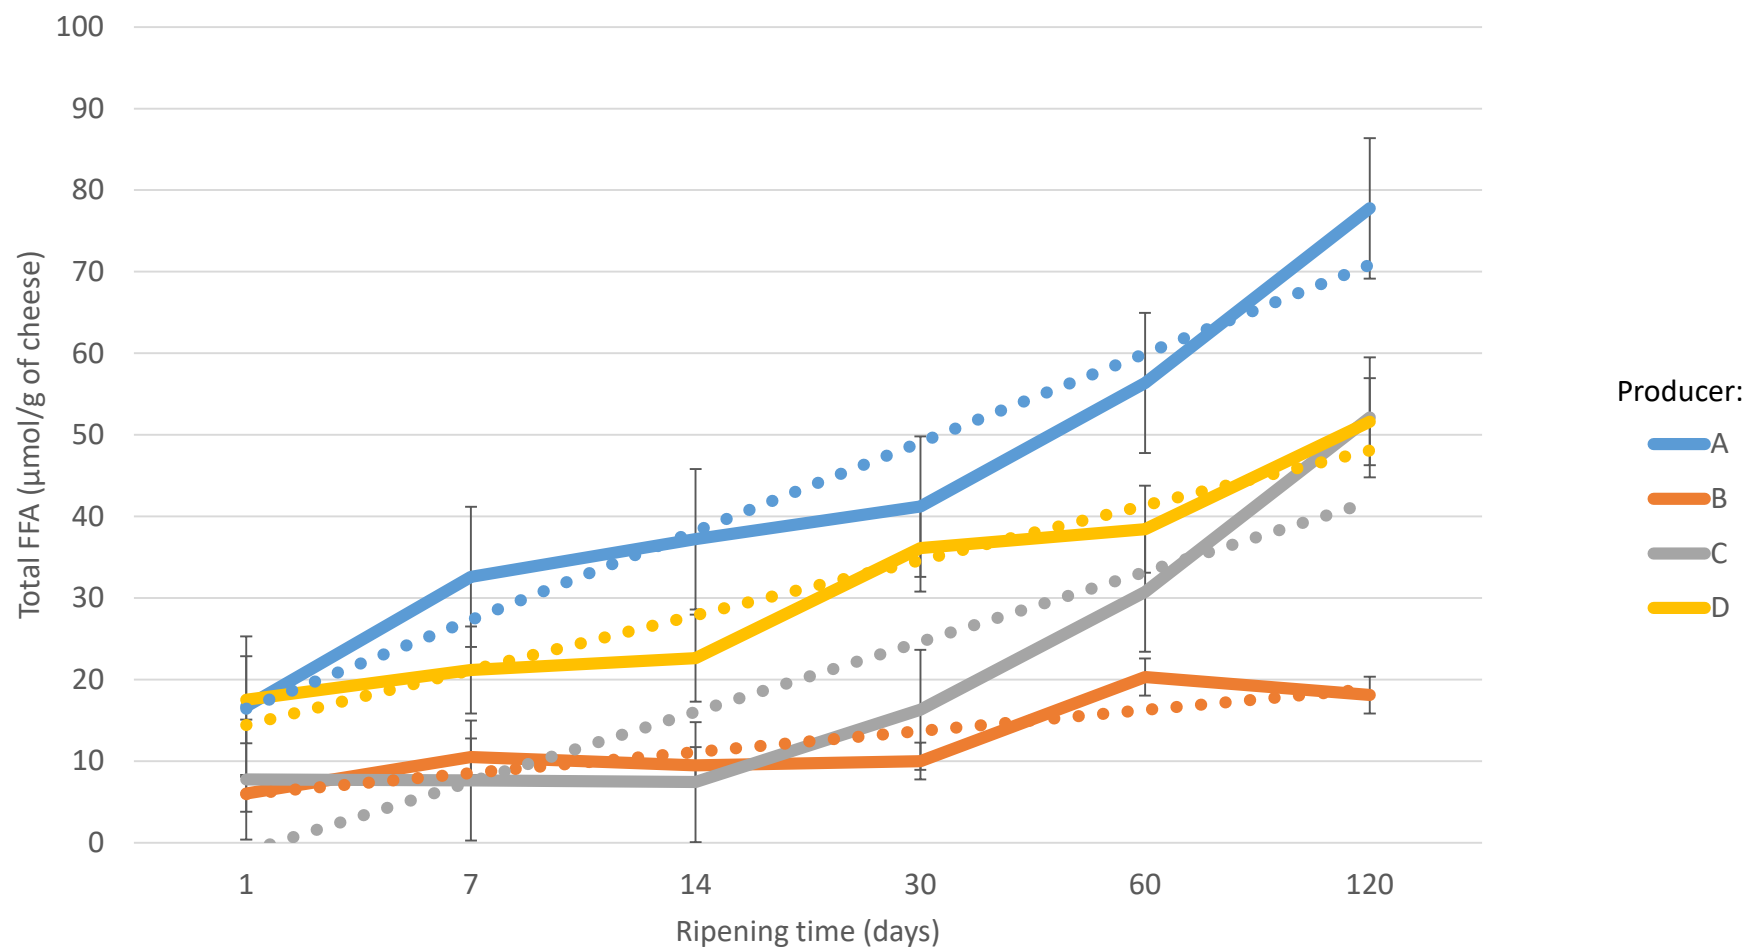

**Figure S1.** Total concentrations of FFAs ( $\mu\text{mol/g}$  of cheese) accumulated during ripening time of Idiazabal cheese from four producers (A, B, C and D). Error bars represent the standard deviation of the measurements.
