# Supplementary figures and images for: Relationship between the Dynamics of Gross Composition, Free Fatty Acids and Biogenic Amines, and Microbial Shifts during the Ripening of Raw Ewe Milk-Derived Idiazabal Cheese
Source: MDPI journal article supplement (doi:10.3390/ani12223224), 2022-11-21

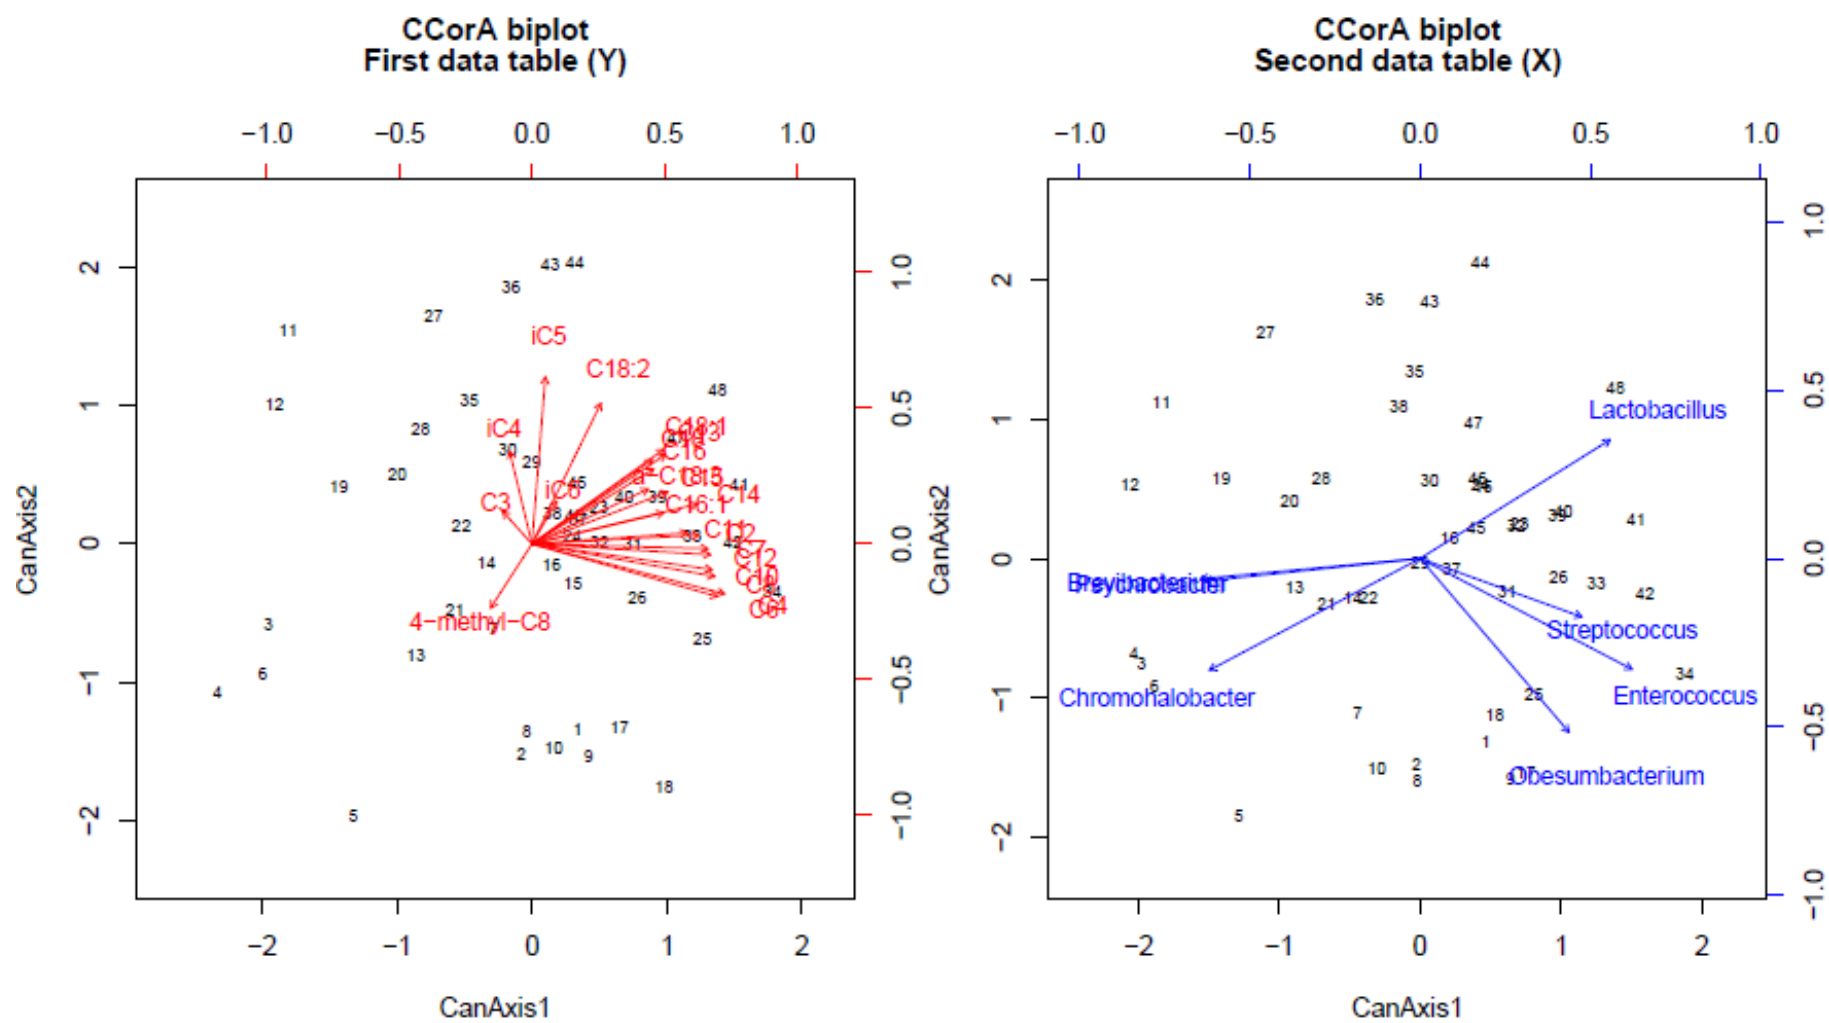

**Figure S3.** CCorA analysis between key bacterial genera and FFAs.

Supplement: s1 [file s1]

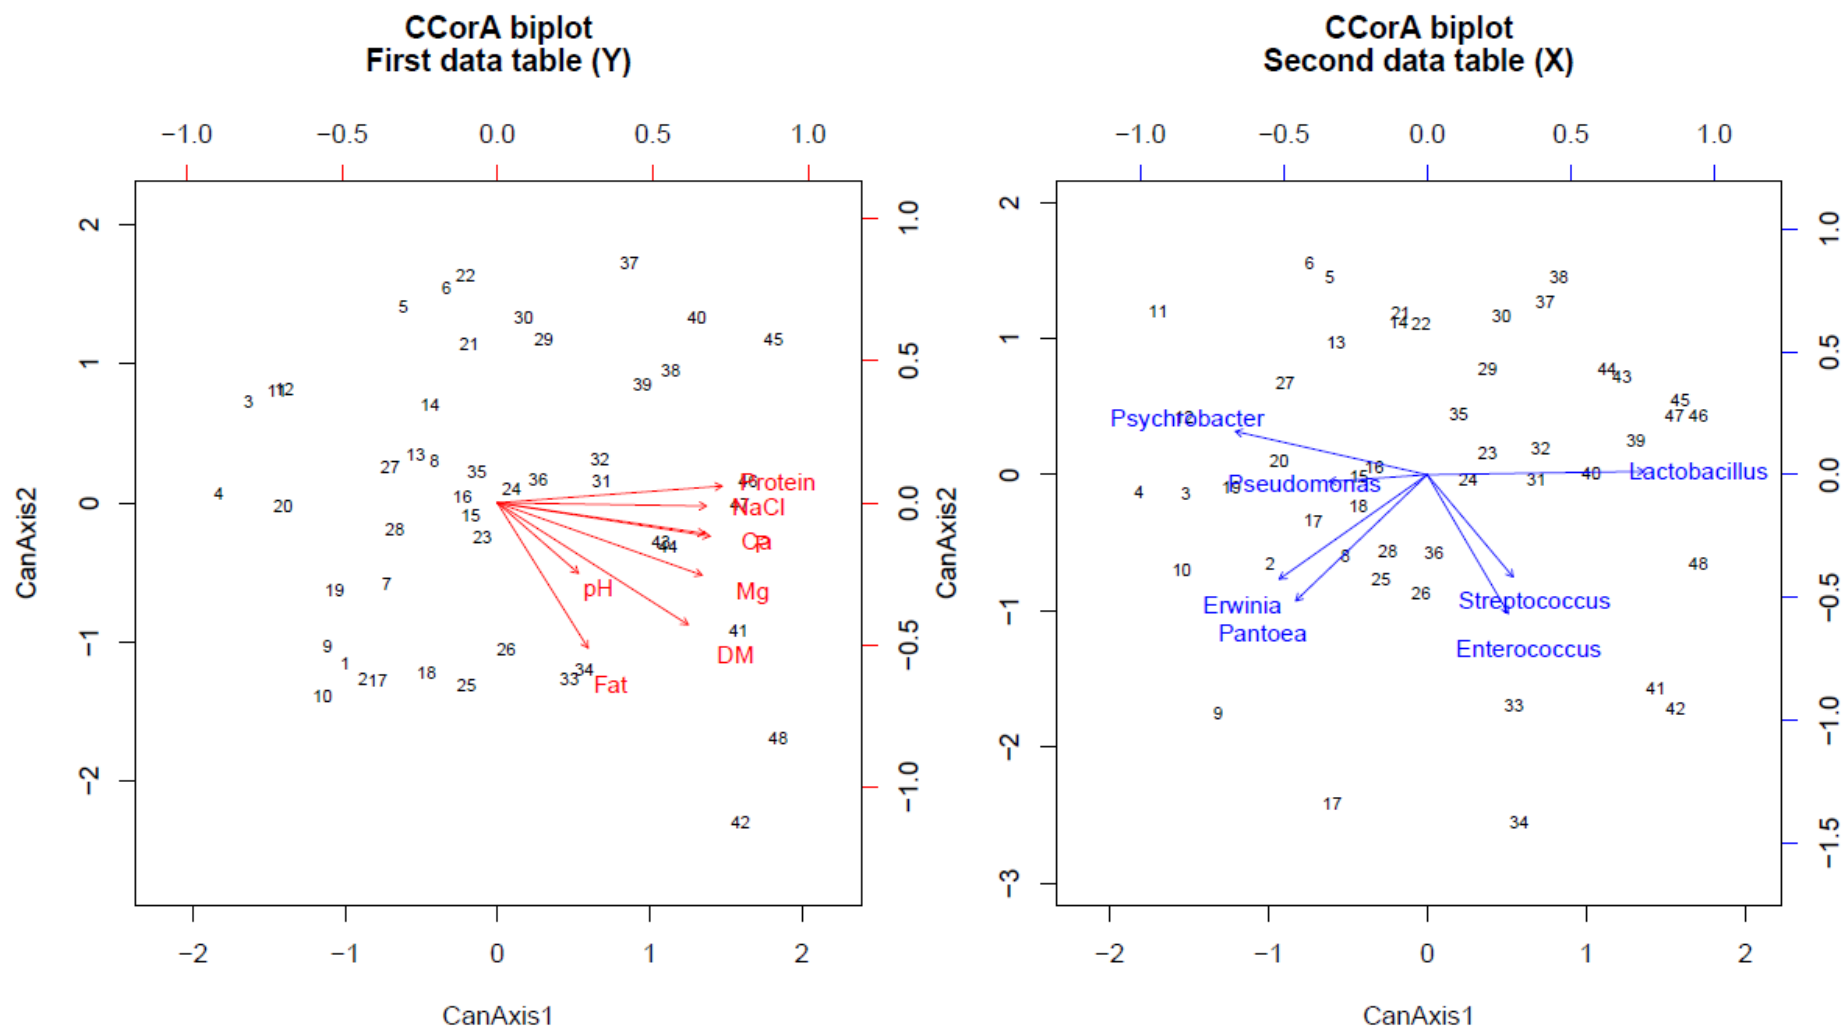

**Figure S2.** CCorA analysis between key bacterial genera and gross composition parameters.

Supplement: s1 [file s1]
